# Supplementary material
Source: PubMed Central journal article supplement (PMC6474348)
Supplement: NIHMS1503256-supplement-1.pdf [file NIHMS1503256-supplement-1.pdf]

**Cell Reports, Volume 24**

**Supplemental Information**

**Conservation of Structure and Immune**

**Antagonist Functions of Filoviral VP35**

**Homologs Present in Microbat Genomes**

**Megan R. Edwards, Hejun Liu, Reed S. Shabman, Garrett M. Ginell, Priya Luthra, Parmeshwaran Ramanan, Lisa J. Keefe, Bernd Köllner, Gaya K. Amarasinghe, Derek J. Taylor, Daisy W. Leung, and Christopher F. Basler**

**Table S1. Crystallographic Data Collection and Structure Determination Statistics of batVP35 RR, Related to Figure 6.**

| <b>Data Collection</b>                      |                                    |
|---------------------------------------------|------------------------------------|
| Wavelength (Å)                              | 1.77110                            |
| Space group                                 | $P3_2 2 1$                         |
| Unit cell parameters                        |                                    |
| Size (Å)                                    | $a=78.1, b=78.1, c=43.5$           |
| Angle (°)                                   | $\alpha=\gamma=90.0, \beta=120$    |
| Resolution range (Å)                        | 39.063-2.6 (2.693 - 2.6)           |
| Unique reflections                          | 4730 (409)                         |
| Completeness (%)                            | 95.1 (86.5)                        |
| Average redundancy                          | 6.8 (6.7)                          |
| mean $I/\sigma(I)$                          | 11.97 (1.08)                       |
| $R_{\text{merge}}$ (%) <sup>a</sup>         | 0.0873 (1.42)                      |
| $CC_{1/2}$ <sup>b</sup>                     | 0.998 (0.609)                      |
| $CC^*$ <sup>c</sup>                         | 1 (0.87)                           |
| Wilson B factors (Å <sup>2</sup> )          | 61.8                               |
| <b>Refinement Statistics</b>                |                                    |
| Reflections                                 | 4662 (409)                         |
| Free reflections                            | 200 (9)                            |
| R factor (%) <sup>d</sup>                   | 17.10 (25.98)                      |
| $R_{\text{free}}$ (%) <sup>e</sup>          | 22.27 (31.50)                      |
| RMSD bond lengths (Å) <sup>f</sup>          | 0.005                              |
| RMSD bond angles (°)                        | 0.75                               |
| Mean B factors (Å <sup>2</sup> )            | 67.76                              |
| Validation and stereochemistry <sup>g</sup> |                                    |
| Number of protein residues                  | 125                                |
| Number of waters                            | 7                                  |
| Most favored residues (%)                   | 96.75                              |
| Generously allowed residues (%)             | 3.25                               |
| Outlier (%)                                 | 0                                  |
| Molprobity Clashescore, all atoms           | 7.61 (83 <sup>rd</sup> percentile) |
| Molprobity Score                            | 1.92 (92 <sup>nd</sup> percentile) |

Parameters for the outermost resolution shell are shown in parentheses.

<sup>a</sup>  $R_{\text{merge}} = \frac{\sum_{hkl} \sum_i |I_i(hkl) - \langle I(hkl) \rangle|}{\sum_{hkl} \sum_i I_i(hkl)}$ , where  $I_i(hkl)$  is the intensity of  $i$ th observation and  $\langle I(hkl) \rangle$  is the mean value for reflection  $hkl$ .

<sup>b</sup>  $CC_{1/2}$ : percentage of correlation between intensities from random half-datasets;

<sup>c</sup>  $CC^* = \sqrt{[2CC_{1/2}/(1+CC_{1/2})]}$ .

<sup>d</sup> R factor =  $\frac{\sum_{hkl} ||F_{\text{obs}}| - |F_{\text{calc}}||}{\sum_{hkl} |F_{\text{obs}}|}$ , where  $F_{\text{obs}}$  and  $F_{\text{calc}}$  are the observed and calculated structure-factor amplitudes, respectively.

<sup>e</sup>  $R_{\text{free}}$  is equivalent to the R factor, but calculated with reflections excluded from the refinement process (5% of all reflections).

<sup>f</sup> RMSD: root-mean-square deviation from ideal values.

<sup>g</sup> The categories were defined by MolProbity.

**Table S2. Filovirus-like *Myotis* VP35 residues with significant evidence of positive selection. Only codons with significant scores for three methods are considered, Related to STAR methods.**

| Codon <sup>a</sup> | SLAC<br>dN-dS | SLAC<br>p-value | FEL<br>dN-dS | FEL<br>p-value | MEME<br>$\omega^+$ | MEME<br>p-value | FUBAR<br>dN-dS | FUBAR<br>Post. Pr. |
|--------------------|---------------|-----------------|--------------|----------------|--------------------|-----------------|----------------|--------------------|
| 189                | 12.460        | 0.088           | 40.186       | 0.024          | >100               | 0.036           | 2.903          | 0.994              |
| 209                | 11.280        | 0.134           | 40.657       | 0.032          | >100               | 0.047           | 2.719          | 0.993              |
| 223                | 6.824         | 0.228           | 23.171       | 0.064          | >100               | 0.083           | 0.972          | 0.930              |

Residues under selection determined using DataMonkey Rapid Detection of Positive Selection.

<sup>a</sup> Using batVP35 numbering

**Table S3. Filovirus-like *Myotis* VP35 residues with significant evidence of negative selection. Only codons with significant scores for three methods are considered, Related to STAR methods.**

| Codon <sup>a</sup> | SLAC<br>dN-dS | SLAC<br>p-value | FEL<br>dN-dS | FEL<br>p-value | FUBAR<br>dN-dS | FUBAR<br>Post. Pr. <sup>b</sup> |
|--------------------|---------------|-----------------|--------------|----------------|----------------|---------------------------------|
| 94                 | -10.608       | 0.055           | -37.318      | 0.012          | -2.158         | 0.980                           |
| 103                | -15.607       | 0.030           | -65.626      | 0.006          | -4.684         | 0.980                           |
| 132                | -16.129       | 0.012           | -60.765      | 0.002          | -4.431         | 0.999                           |
| 134                | -19.129       | 0.062           | -93.188      | 0.028          | -7.325         | 0.978                           |
| 176                | -12.097       | 0.037           | -38.523      | 0.011          | -2.261         | 0.983                           |
| 178                | -12.097       | 0.037           | -51.164      | 0.004          | -3.903         | 0.995                           |
| 181                | -15.607       | 0.030           | -66.189      | 0.006          | -4.721         | 0.981                           |
| 210                | -15.607       | 0.030           | -50.335      | 0.008          | -3.400         | 0.972                           |
| 273                | -12.097       | 0.037           | -49.807      | 0.006          | -4.381         | 0.996                           |

<sup>a</sup> Using batVP35 numbering

<sup>b</sup> Posterior Probability

Figure S1

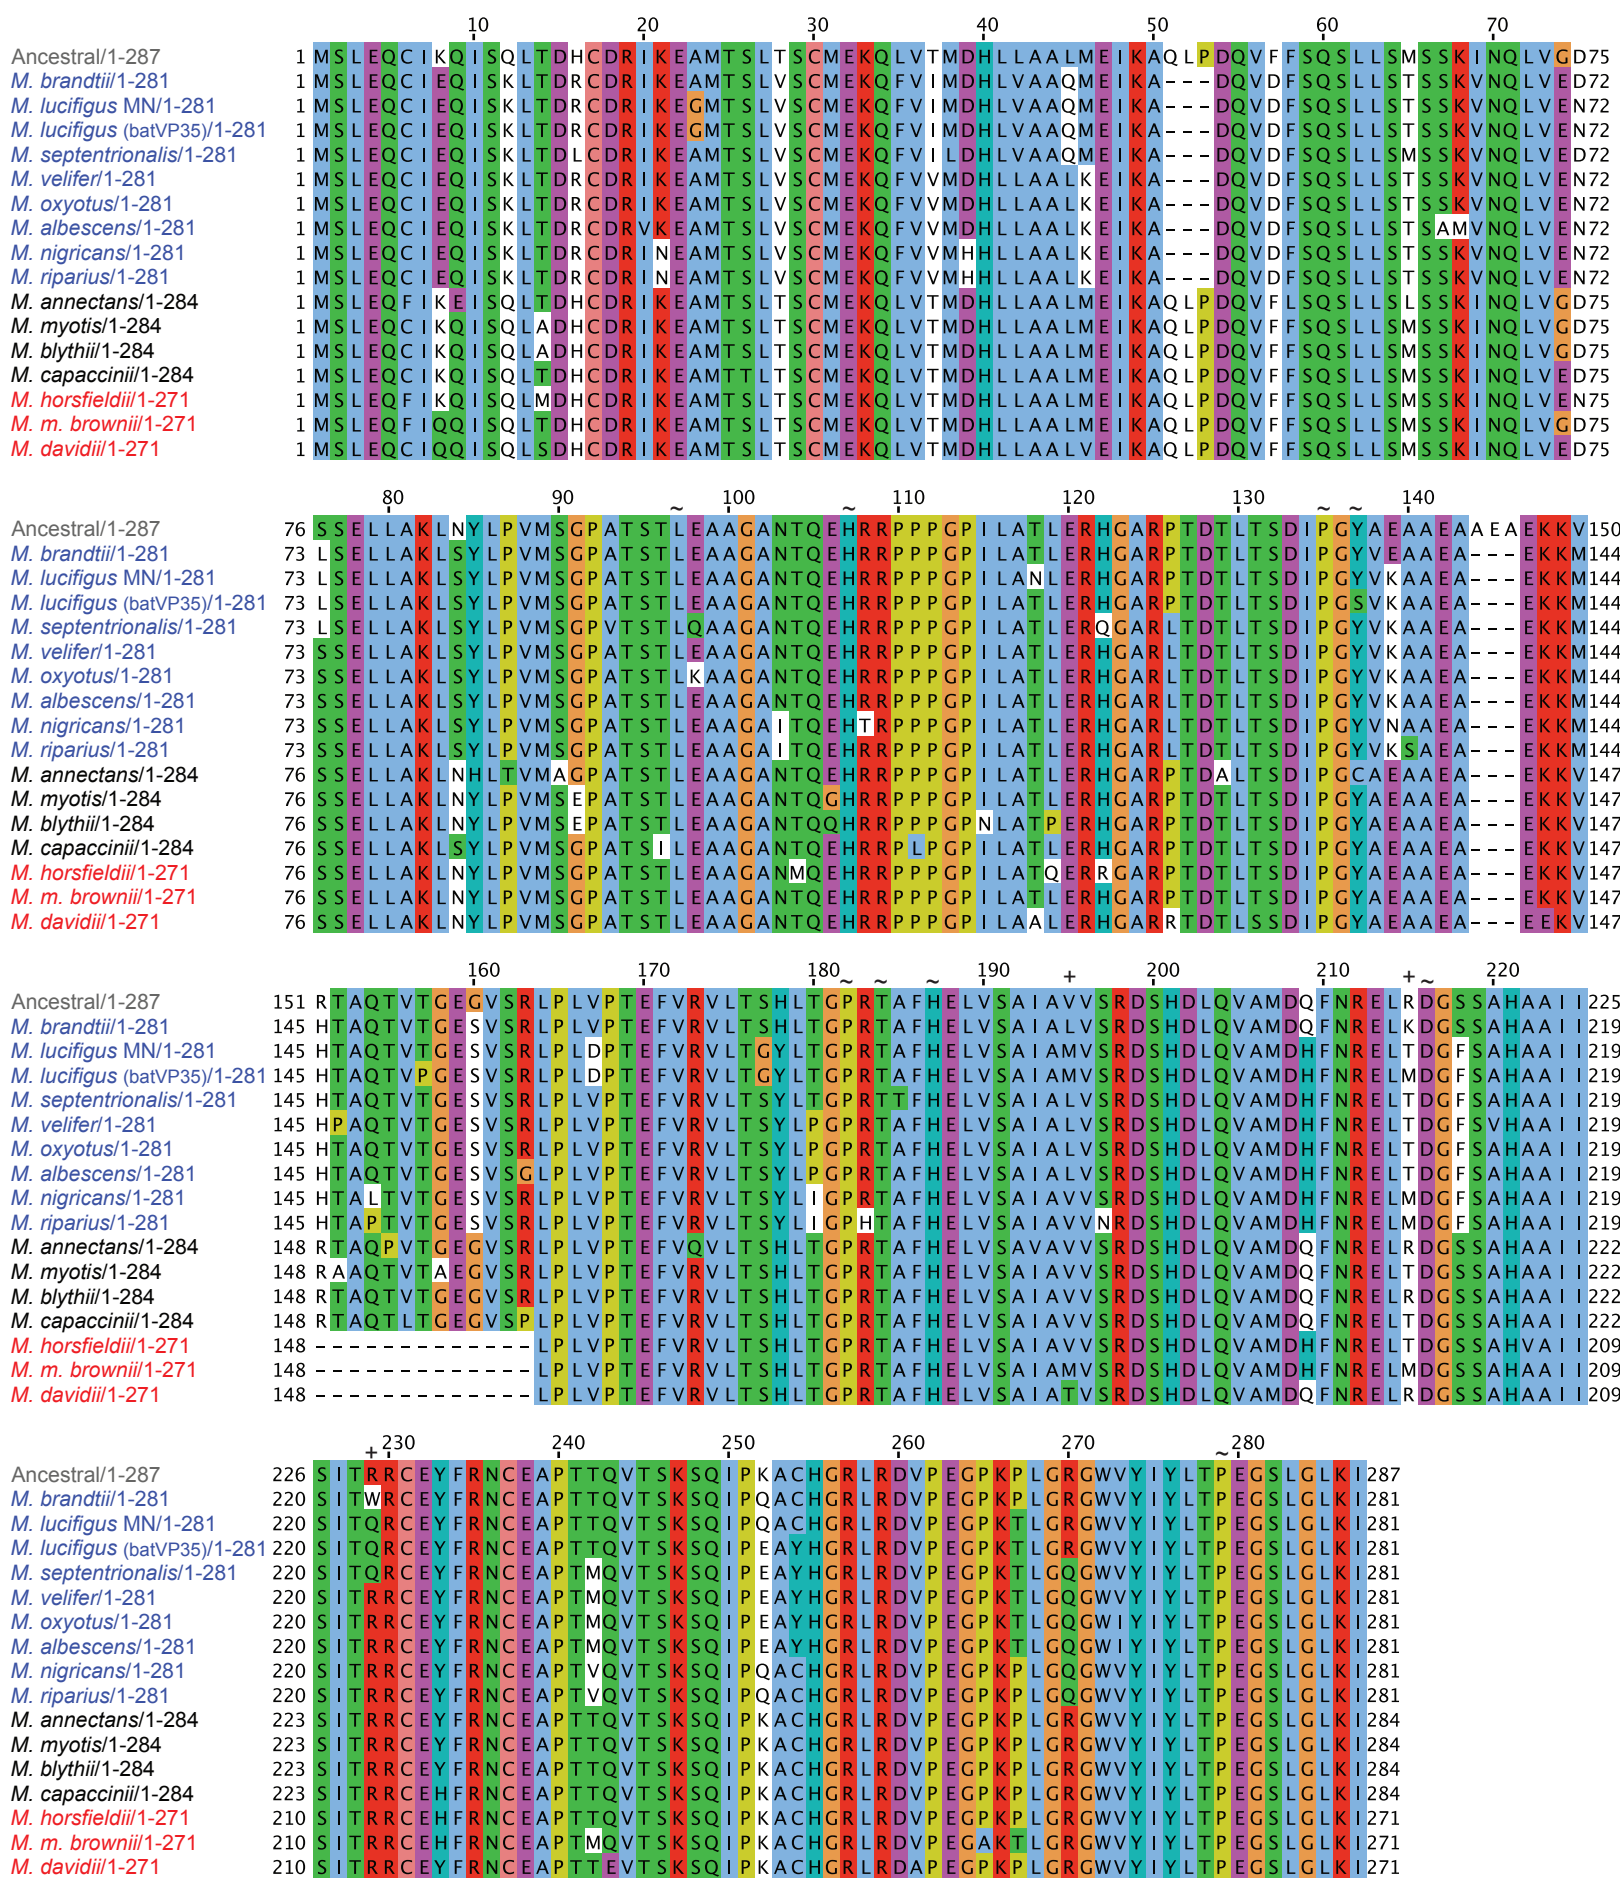

**Figure S1. Alignment of Myotis VP35 sequences.** Related to Figure 1. Amino acid sequences for each Myotis VP35 were aligned using MultAlin. The alignment was imported into Jalview, and the default Clustalx coloring was applied. Residues under purifying selection are indicated with ~, residues under diversifying selection are indicated with +.

Figure S2

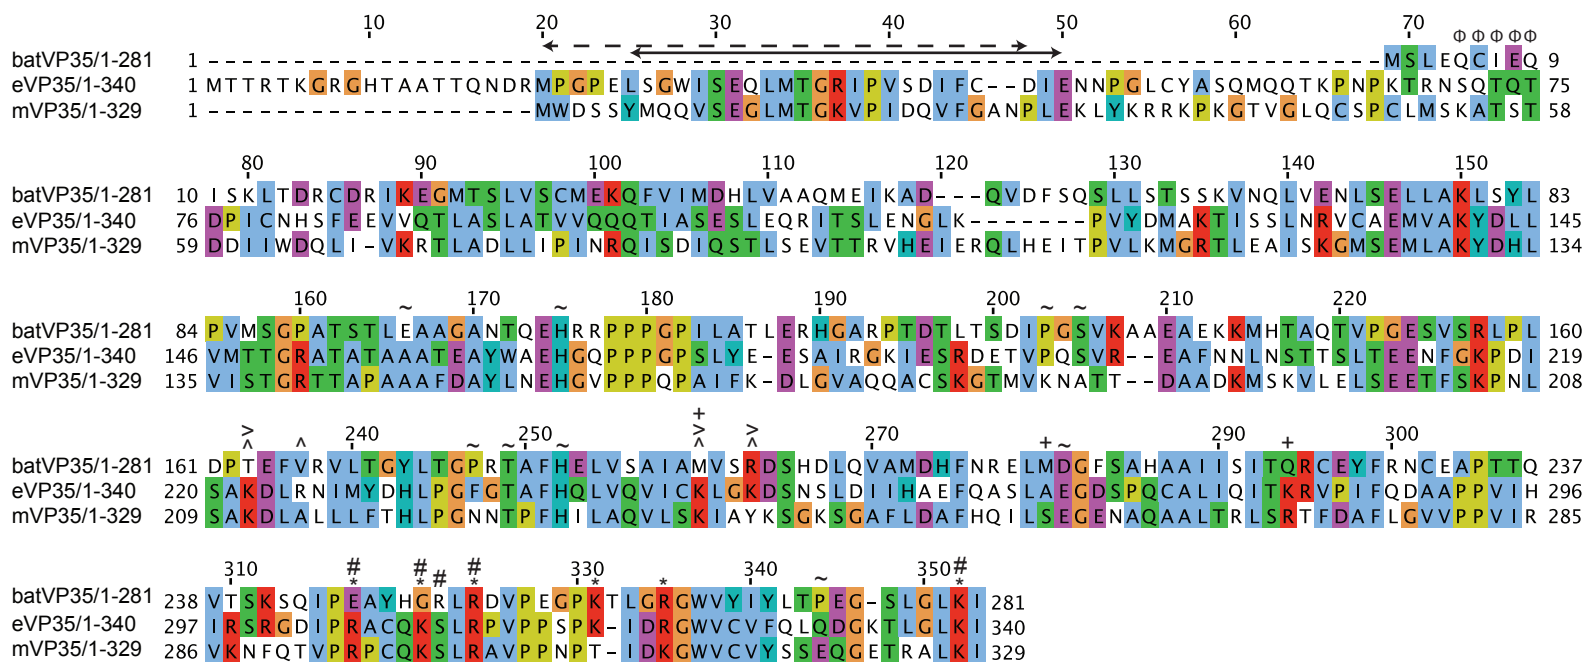

**Figure S2. Alignment of batVP35 with extant filovirus VP35s.** Related to Figure 2. Sequences were aligned using MultAlin and were imported into Jalview and the default Clustalx coloring was applied. Residues of interest are indicated using the following key: ~ residues under purifying selection in batVP35, + residues under diversifying selection in batVP35, # mVP35 central basic patch, \* eVP35 central basic patch, > mVP35 first basic patch, ^ eVP35 first basic patch, and phi eVP35 LC8 binding motif. Solid line with arrowheads denotes eVP35 NP binding peptide (NPBP) and dashed line with arrowheads indicates mVP35 NPBP.

Figure S3

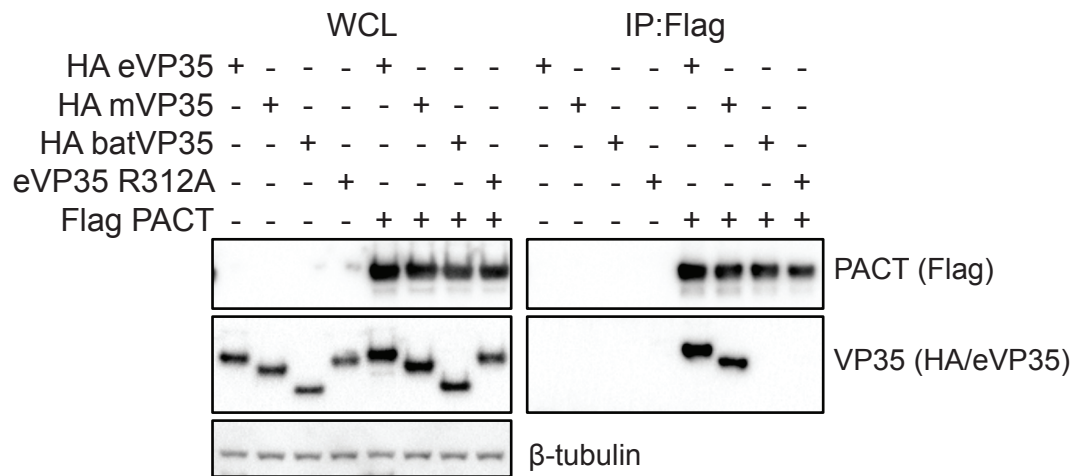

**Figure S3. batVP35 does not interact with PACT.** Related to Figure 2. Co-immunoprecipitation assay performed with Flag antibody on lysates of HEK293T cells expressing Flag-tagged PACT, HA-tagged eVP35, mVP35 and batVP35 and untagged eVP35 R312A as indicated. The co-immunoprecipitation was repeated three times, and a representative western blot is shown. Western blots were performed for the HA and Flag epitope tags and anti-eVP35 as indicated. WCL, whole cell lysate; IP, immunoprecipitation.
